# Supplementary material for: Multidimensional analysis of Gammaherpesvirus RNA expression reveals unexpected heterogeneity of gene expression
Source: bioRxiv or medRxiv preprint supplement (doi:10.1101/482042), 2019-04-11
Supplement: Supplementary file [file media-1.pdf]

**Supplemental Data and Tables for “Multidimensional analysis of Gammaherpesvirus RNA expression reveals unexpected heterogeneity of gene expression”**

Lauren M. Oko<sup>1</sup>, Abigail K. Kimball<sup>2</sup>, Rachael E. Kaspar<sup>2</sup>, Ashley N. Knox<sup>1</sup>, Tim Chang<sup>3</sup>, Benjamin Alderete<sup>3</sup>, Linda F. van Dyk<sup>1\*</sup>, Eric T. Clambey<sup>2\*#</sup>

**Affiliations:**

<sup>1</sup> Department of Immunology and Microbiology, <sup>2</sup> Department of Anesthesiology, University of Colorado Denver | Anschutz Medical Campus, Aurora, CO, 80045, USA

<sup>3</sup> MilliporeSigma, a business of Merck KGaA, Darmstadt, Germany (Seattle, WA)

**\* Co-Corresponding authors:**

Eric T. Clambey, [eric.clambey@ucdenver.edu](mailto:eric.clambey@ucdenver.edu), 303-724-7783 (phone)

Linda F. van Dyk, [linda.vandyk@ucdenver.edu](mailto:linda.vandyk@ucdenver.edu), 303-724-4207 (phone)

**# Lead author** for MS correspondence

Table S1: Viral and host probes for PrimeFlow™ analysis

| <b>Target and probe name</b>   | <b>Fluorochrome</b> | <b>ThermoFisher Probe number</b> |
|--------------------------------|---------------------|----------------------------------|
| Mouse $\beta$ -Actin Type 1    | Alexa Fluor® 647    | VB1-10350                        |
| Mouse $\beta$ -Actin Type 4    | Alexa Fluor® 488    | VB4-10432                        |
| Mouse $\beta$ -Actin Type 6    | Alexa Fluor® 750    | VB6-12823                        |
| Murid Herpesvirus ORF73 Type 1 | Alexa Fluor® 647    | VF1-17077                        |
| Murid Herpesvirus TMER Type 1  | Alexa Fluor® 647    | VF1-17076                        |
| Murid Herpesvirus TMER Type 4  | Alexa Fluor® 488    | VF4-17586                        |
| Murid Herpesvirus ORF18 Type 4 | Alexa Fluor® 488    | VF4-6000512                      |
| HHV8 T1.1 Type 4               | Alexa Fluor® 488    | VF4-6000059                      |
| HHV8 ORF73 Type 1              | Alexa Fluor® 647    | VF1-6000252                      |
| HHV4 EBER 1-2 Type 1           | Alexa Fluor® 647    | VF1-12409                        |
| Human $\beta$ -Actin Type 6    | Alexa Fluor® 750    | VA6-10506                        |

Table S2: qPCR primer sets

| <b>PCR primer</b>            | <b>Sequence 5'-3'</b>         | <b>Tm<br/>°C</b> |
|------------------------------|-------------------------------|------------------|
| HV68 tRNA5 sense             | GCC AGG GTA GCT CAA TTG       | 52 °C            |
| miR-M1-12 RLMRTPCR           | AAG GGG TAG GAC TCC CAC       | 52 °C            |
| Mouse bActin Sense           | GCC ACC AGT TCG CCA TGG       | 56 °C            |
| Mouse bActin Antisense Inner | CAG GGT CAG GAT ACC TCT CTT G | 56 °C            |
| ORF73 RT-PCR Reverse Primer  | GAG CCC CCT ACA GAG CCC CC    | 59 °C            |
| ORF73 RT-PCR Forward Primer  | CAC CTT GCT CAC CGG CA        | 59 °C            |
| Hu bActin SYBR green Forward | GAT GAG ATT GGC ATG GCT TT    | 60 °C            |
| Hu bActin SYBR green Reverse | CAC CTT CAC CGT TCC AGT TT    | 60 °C            |
| KSHV ORF50 Forward           | TCC GGC GGA TAT ACC GTC AC    | 60 °C            |
| KSHV ORF50 Reverse           | GGT GCA GCT GGT ACA GTG TG    | 60 °C            |
