# Supplementary material for: Multidimensional analysis of Gammaherpesvirus RNA expression reveals unexpected heterogeneity of gene expression
Source: bioRxiv or medRxiv preprint supplement (doi:10.1101/482042), 2019-04-11
Supplement: Supplementary file [file media-2.pdf]

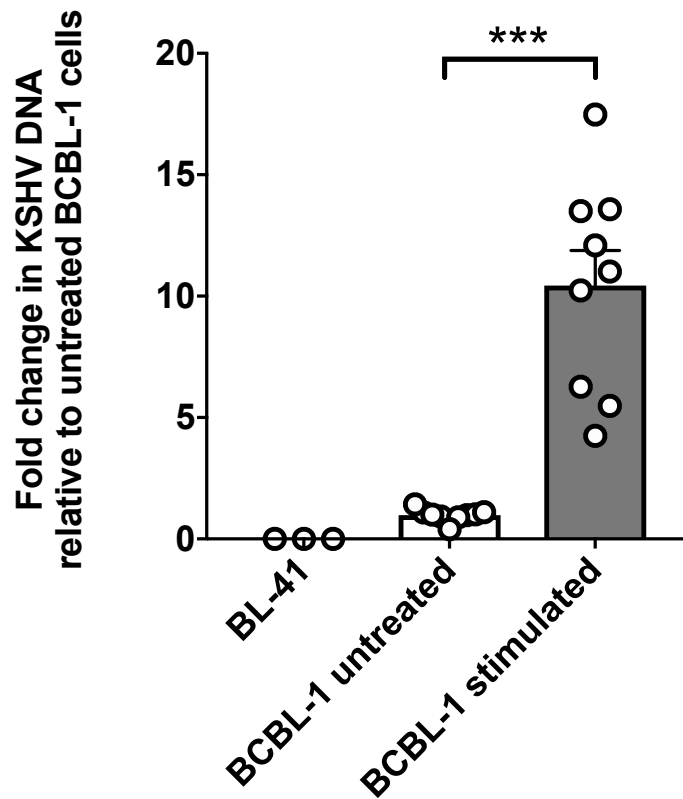

**Supplemental Figure 1. Analysis of KSHV genomic DNA in BCBL-1 cells either untreated or stimulated.** Data depict qPCR analysis of KSHV genomic DNA, quantified using PCR primers for the KSHV gene 50. Fold change in KSHV DNA was calculated relative to untreated BCBL-1 cells, using  $\Delta C_t$  normalized to mass unit, defined using 100 ng DNA. Data compiled from 3 independent experiments for BCBL-1 cultures, with 3 biological replicates per experiment. Data from BL-41 cells derived from a single experiment, with 3 biological replicates. Data depict mean  $\pm$  SEM, with individual biological replicates depicted using individual symbols. Statistical analysis of the difference between untreated and stimulated samples was done using an unpaired t test, with Welch's correction, with statistical significance defined by **\*\*\***,  $p < 0.001$ .
